# Supplementary material for: Accelerated Genetic Gains in Early-Maturing Maize Hybrids following Three Periods of Genetic Enhancement for Grain Yield under Low and High Soil-Nitrogen Environments
Source: MDPI journal article supplement (doi:10.3390/plants11091208), 2022-04-29
Supplement: s1 [file s1]

## Supplementary

Table S1: Pedigree, period and source of 54 early-maturing maize hybrids used in the present study.

| Entry | Pedigree                                     | Period | Source |  |
|-------|----------------------------------------------|--------|--------|--|
| 1     | TZE-W Pop DT STR x TZEI 19                   | 1      | IITA   |  |
| 2     | (TZEI 63 x TZEI 87) x (TZEI 59 x TZEI 108)   | 1      | IITA   |  |
| 3     | (TZEI 135 x TZEI 129) x (TZEI 16 x TZEI 157) | 1      | IITA   |  |
| 4     | TZE-Y Pop DT STR x TZEI 17                   | 1      | IITA   |  |
| 5     | TZEI 23 x TZEI 13                            | 1      | IITA   |  |
| 6     | (TZEI 63 x TZEI 59) x TZEI 87                | 1      | IITA   |  |
| 7     | TZE W Pop DT STR C4 x TZEI 22                | 1      | IITA   |  |
| 8     | TZEI 24 x TZEI 17                            | 1      | IITA   |  |
| 9     | TZEI 16 x TZEI 8                             | 1      | IITA   |  |
| 10    | TZE Y Pop DT STR C4 x TZEI 11                | 1      | IITA   |  |
| 11    | TZEI 188 x TZEI 98                           | 1      | IITA   |  |
| 12    | TZEI 7 x TZEI 26                             | 1      | IITA   |  |
| 13    | TZEI 31 x TZEI 63                            | 1      | IITA   |  |
| 14    | TZEI 5 x TZEI 98                             | 1      | IITA   |  |
| 15    | TZEI 14 x TZEI 25                            | 1      | IITA   |  |
| 16    | TZEI 31 x TZEI 18                            | 1      | IITA   |  |
| 17    | ENT 12 x TZEI 48                             | 1      | IITA   |  |
| 18    | TZEI 83 x TZEI 60                            | 1      | IITA   |  |
| 19    | TZdEI 173 x TZdEI 352                        | 3      | IITA   |  |
| 20    | TZdEI 157 x TZdEI 352                        | 3      | IITA   |  |
| 21    | TZdEI 173 x TZdEI 280                        | 3      | IITA   |  |
| 22    | TZdEI 124 x TZdEI 268                        | 3      | IITA   |  |
| 23    | TZdEI 314 x TZdEI 105                        | 3      | IITA   |  |
| 24    | TZdEI 173 x TZdEI 492                        | 3      | IITA   |  |
| 25    | TZdEI 268 x TZdEI 131                        | 3      | IITA   |  |
| 26    | TZdEI 378 x TZdEI 173                        | 3      | IITA   |  |
| 27    | TZdEI 378 x TZdEI 98                         | 3      | IITA   |  |
| 28    | TZdEI 352 x TZdEI 315                        | 3      | IITA   |  |
| 29    | TZEI 18 x TZdEI 352                          | 3      | IITA   |  |
| 30    | TZdEI 479 x TZdEI 124                        | 3      | IITA   |  |
| 31    | TZdEI 352 x TZdEI 441                        | 3      | IITA   |  |
| 32    | TZdEI 17 x TZEI 17                           | 3      | IITA   |  |
| 33    | TZdEI 68 x TZEI 10                           | 3      | IITA   |  |
| 34    | TZdEI 21 x TZEI 23                           | 3      | IITA   |  |
| 35    | TZdEI 24 x TZEI 17                           | 3      | IITA   |  |
| 36    | TZdEI 21 x TZEI 10                           | 3      | IITA   |  |

|    |                                   |   |      |  |
|----|-----------------------------------|---|------|--|
| 37 | TZdEI 352 x TZEI 355              | 2 | IITA |  |
| 38 | TZdEI 352 x TZEI 383              | 2 | IITA |  |
| 39 | TZEI 352 x TZdEI 352              | 2 | IITA |  |
| 40 | TZEI 355 x TZdEI 425              | 2 | IITA |  |
| 41 | TZEI 326 x TZdEI 352              | 2 | IITA |  |
| 42 | TZE-W Pop DT C5 STR C5 x TZEI 63  | 2 | IITA |  |
| 43 | TZEI 326 x TZdEI 425              | 2 | IITA |  |
| 44 | TZE-Y Pop DT C5 STR C5 x ENT 13   | 2 | IITA |  |
| 45 | TZE-Y Pop DT C5 STR C5 x TZEI 129 | 2 | IITA |  |
| 46 | TZEI 495 x ENT 13                 | 2 | IITA |  |
| 47 | TZEI 470 x ENT 13                 | 2 | IITA |  |
| 48 | TZEI 474 x TZEI 17                | 2 | IITA |  |
| 49 | TZEI 507 x TZEI 129               | 2 | IITA |  |
| 50 | TZEI 516 x ENT 13                 | 2 | IITA |  |
| 51 | TZEI 474 x TZEI 10                | 2 | IITA |  |
| 52 | TZEI 486 x TZEI 23                | 2 | IITA |  |
| 53 | TZE-Y Pop DT C5 STR C5 x TZEI 17  | 2 | IITA |  |
| 54 | TZE-Y Pop DT C5 STR C5 x TZEI 10  | 2 | IITA |  |
